## STUDY PROTOCOL

# Effect of Chinese herbal medicine formula on progression-free survival among patients with metastatic colorectal cancer: Study protocol for a multi-center, double-blinded, randomized, placebo-controlled trial

Qiaoling Wang<sup>1</sup>\*, Zhuohong Li<sup>2</sup>\*, Jing Guo<sup>1</sup>, Wenyuan Li<sup>3</sup>, Fengming You<sup>1,2</sup>\*

**1** Department of Scientific Research, Hospital of Chengdu University of Traditional Chinese Medicine, Chengdu, Sichuan Province, China, **2** Department of Oncology, Hospital of Chengdu University of Traditional Chinese Medicine, Chengdu, Sichuan Province, China, **3** Evidence-Based Medicine Center, Hospital of Chengdu University of Traditional Chinese Medicine, Chengdu, Sichuan Province, China

☉ These authors contributed equally to this work.

\* [qiaoling86@126.com](mailto:qiaoling86@126.com) (QW); [yfmdoc@163.com](mailto:yfmdoc@163.com) (FY)

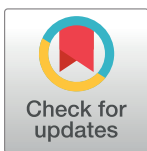

## OPEN ACCESS

**Citation:** Wang Q, Li Z, Guo J, Li W, You F (2022) Effect of Chinese herbal medicine formula on progression-free survival among patients with metastatic colorectal cancer: Study protocol for a multi-center, double-blinded, randomized, placebo-controlled trial. *PLoS ONE* 17(12): e0275058. <https://doi.org/10.1371/journal.pone.0275058>

**Editor:** Sudeep Gupta, Tata Memorial Centre, INDIA

**Received:** April 22, 2022

**Accepted:** August 23, 2022

**Published:** December 16, 2022

**Copyright:** © 2022 Wang et al. This is an open access article distributed under the terms of the [Creative Commons Attribution License](https://creativecommons.org/licenses/by/4.0/), which permits unrestricted use, distribution, and reproduction in any medium, provided the original author and source are credited.

**Data Availability Statement:** No datasets were generated or analysed during the current study. All relevant data from this study will be made available upon study completion.

**Funding:** This project is funded by National Administration of Traditional Chinese Medicine: 2019 Project of building evidence based practice capacity for TCM (No. 2019XZZX-ZL006). The Foundation provides research funds and evaluates the research results, but is not involved in the

## Abstract

### Introduction

Metastatic colorectal cancer (mCRC) causes high cancer-related morbidity and mortality worldwide. Although chemotherapy and targeted agents treatment improve median survival and 5-year survival rates, there is only one-third of patients who adhere to treatment protocol until the pause of disease progression. Hezhong granule is a traditional Chinese herbal formula used for mCRC, which has shown good potential in alleviating the adverse effects of chemotherapy, enhancing the effectiveness of chemotherapy, and improving the quality of life. Therefore, the purpose of the study is to further validate the clinical efficacy and safety of the Chinese herbal medicine formula named Hezhong (HZ) in combination with standard chemotherapy and cetuximab (CET) or bevacizumab (BV) for treating mCRC.

### Methods

In this multi-center, randomized, double-blinded, placebo-controlled trial, 360 eligible mCRC patients who will be randomly assigned to Hezhong or placebo group with a 1: 1 ratio. Participants in the Hezhong group will receive standard chemotherapy and CET or BV plus Hezhong Granule until the pause of disease progression, death, the exhibition of intolerable toxicity, or up to 6 months, while the placebo group will treat with standard chemotherapy and CET or BV plus placebo. The primary endpoint is progression-free survival (PFS). The secondary endpoints are overall survival (OS), objective response rate (ORR), safety, quality of life years (QOL), and chemotherapy-induced nausea and vomiting (CINV).

study design, data collection, analysis, the decision to publish or preparation of the manuscript.

**Competing interests:** The authors have declared that no competing interests exist.

## Expected results

The expected results of this trial are to improve the PFS and QOL of patients with mCRC and provide evidence-based recommendations for the treatment of mCRC with traditional Chinese medicine in China.

## Trial registration

The trial has been registered with the Chinese Clinical Trial Registry (ChiCTR). The trial registration number was [ChiCTR2100041643](https://www.chictr.org/cttr2100041643).

## Introduction

Colorectal cancer (CRC) is one of the most commonly diagnosed cancer worldwide and the second most deadly cancer leading to more than 935 000 deaths annually [1, 2]. The incidence rate of colorectal cancer has been increasing year by year and now it ranks third among malignant tumors. It is the second most common cancer cause of death in China [3]. According to the data on Cancer statistics in China, colorectal cancer is expected to account for 12.28% of all new malignancies in China in 2022 [4]. Approximately 20%-30% of colorectal cancer patients present with advanced stages at the time of diagnosis, and patients in the early stages of the disease also have a 25%-50% chance of developing metastases [5, 6]. In recent years, the use of cytotoxic chemotherapies and targeted agents therapies led to a significant increase in overall survival, but mCRC remains incurable in most cases [4]. Drug resistance and chemotherapy-related toxic side effects are the main causes for the failure or discontinuation of chemotherapy in mCRC. The effectiveness of the first-line chemotherapeutic agents for primary treatment of mCRC is only 40%-60%. The efficiency of second-line chemotherapeutic agents is less than 30%, and the efficiency of chemotherapy in patients who are not successful with second-line chemotherapy is even lower, usually less than 15% [7]. For this group of patients who have cancer progression after second-line chemotherapy, effective treatment is lacking [8]. Furthermore, with the increase of chemotherapy cycles, the toxic side effects of chemotherapy also increase, and therefore, most patients discontinue chemotherapy because of intolerance to the toxic side effects [9]. Consequently, prolonging survival, reducing the rate of recurrence and metastasis, and improving the quality of life of patients with mCRC are problematic, and hence, alternative treatments are sought.

Chinese herbal medicine (CHM) has become a complementary alternative therapy in the treatment of cancers including CRC and its use is widely accepted in China [10, 11]. CHM was shown to inhibit colon tumor formation, proliferation, migration, induce apoptosis and modulate angiogenesis of CRC cells [12–14]. In addition, many clinical trials showed that CHM used in combination with chemotherapies reduced toxicity induced by the chemotherapy, enhanced immune function, improved quality of life, and maintained safety [15–18]. Hezhong (HZ) granule is a Chinese herbal formula composed of eight herbs including zingibers, ginseng, *Scutellaria baicalensis*, Chinese goldthread rhizome, Indian bread, *Euodia rutaecarpa*, and *Pinellia ternata*, which has been used in the treatment of mCRC for many years as an empirical formula [19–21]. Some studies have shown that Hezhong and its components can inhibit the release of 5-hydroxytryptamine<sub>3</sub> and substance P from chromaffin cells of the gastrointestinal mucosa, reduce the level of tryptophan hydroxylase, down-regulate the expression of the neurokinin-1 receptor, inhibit gastric secretion and pepsin activity, etc.; thereby

promoting the repair of gastric mucosa, inhibiting vomiting center and reducing the reactions of gastrointestinal [22–27]. However, many of the previous studies are deficient in study design, sample size, and evidence to determine whether Hezhong granule can benefit patients with mCRC. Therefore, the current study is to observe the efficacy and safety of the Chinese herbal medicine formula, Hezhong (HZ) granule when combined with standard chemotherapy and molecular targeted therapy in patients with mCRC.

## Study design and methods

This study is a multi-center, randomized, double-blinded, placebo-controlled clinical trial and involves twelve clinical sites in China. A total of 360 mCRC patients will be randomly divided into two groups (1:1). The SPIRIT schedule of tests and procedures for this study can be found in Fig 1. The control group will receive a placebo combined with mFOLFOX6/FOLFIRI/CAPEOX and CET or BV a standard first-line treatment for metastatic colorectal cancer. The treatment group will receive HZ granule in combination with mFOLFOX6/FOLFIRI/CAPEOX and CET or BV (Flow chart, Fig 2). The study protocol obeyed the Standard Protocol Items for Randomized Trials statement, the Declaration of Helsinki, and the Good Clinical Practice guidelines. The study has been registered in the Chinese Clinical Trial Registry (ChiCTR) and the registration number was ChiCTR2100041643.

## Study objectives

Our primary objective is to validate the PFS of participants with mCRC who will be randomized to the HZ or placebo group. PFS is defined as the time from randomization to disease progression or death from any cause, whichever occurred earlier. Secondary objectives are to analyze overall survival (OS, time from the start of therapy to death from any cause), objective response rate (ORR, proportion of patients with confirmed complete or partial response), safety, quality of life (QOL) [28], and chemotherapy-induced nausea and vomiting (CINV) [29], comparing various indicators between two groups.

Tumor assessments will be done every 2 months according to the standard of Response Evaluation Criteria in Solid Tumors version 1.1 (RECIST 1.1) [30] for the initial 6 months, and then every 3 months until disease progression or death during the follow-up time. The European Organization for Research on Treatment of Cancer (EORTC) QLQ-C30 scale will be used to assess the quality of life including functions, symptoms, and living conditions through linear conversion to a percentage system at baseline and every chemotherapy cycle, and thereafter until the end of the follow-up period [31]. Adverse events (AEs) will be recorded during the study based on the incidence, severity, and outcomes. Safety assessments are based on Common Terminology Criteria Adverse Events Version 4.0 (CTCAE v4.0) [32].

## Study setting

The study plans to conduct in twelve medical institutions in China. The hospital at the Chengdu University of Traditional Chinese Medicine lead the research, and other participating units are West China Hospital of Sichuan University, Sichuan Provincial Hospital of Integrated Traditional Chinese and Western Medicine, Chengdu Hospital of Integrated Traditional Chinese and Western Medicine, Affiliated Hospital of North Sichuan Medical College, Guangyuan Central Hospital, Jintang County Hospital of Traditional Chinese Medicine, Yanjiang District Hospital of Ziyang City, Cangxi County People's Hospital, Cangxi County Hospital of Traditional Chinese Medicine, Renshou County People's Hospital, and Pengzhou Hospital of Traditional Chinese Medicine.

| Tests and procedures                                            | Screening            | Treatment Cycles <sup>1</sup>                                                   |   |    |                 |                                |                        | Survival Follow-up        |
|-----------------------------------------------------------------|----------------------|---------------------------------------------------------------------------------|---|----|-----------------|--------------------------------|------------------------|---------------------------|
|                                                                 |                      | Cycles 1 to 4                                                                   |   |    |                 | Cycles 5 and subsequent cycles | End of treatment visit |                           |
| Days( Windows)                                                  | -14 to randomization | 1                                                                               | 8 | 15 | 22 <sup>2</sup> | 1 (± 3)                        | 30 ± 7 day after EOT   | Every 3 months (± 7 days) |
| Inclusion /exclusion criteria                                   | X                    |                                                                                 |   |    |                 |                                |                        |                           |
| Informed consent <sup>3</sup>                                   | X                    |                                                                                 |   |    |                 |                                |                        |                           |
| Demographics/medical history/prior medication                   | X                    |                                                                                 |   |    |                 |                                |                        |                           |
| Physical examination <sup>4</sup>                               | X                    | X                                                                               | X | X  | X               | X                              | X                      |                           |
| Weight, temperature, blood pressure, pulse                      | X                    | X                                                                               | X | X  | X               | X                              | X                      |                           |
| KPS assessment                                                  | X                    | X                                                                               |   |    |                 | X                              | X                      |                           |
| EORTC QLO-C30                                                   | X                    | X                                                                               |   |    |                 | X                              | X                      | X                         |
| Tumor assessment <sup>5</sup>                                   | X                    | 2-monthly CT scan to 6 months<br>3-monthly CT scan 6-36 months when appropriate |   |    |                 |                                |                        |                           |
| Serum CEA <sup>6</sup>                                          | X                    | 2-monthly CEA until CT scan end                                                 |   |    |                 |                                |                        |                           |
| CINV assessment <sup>7</sup>                                    | X                    | X                                                                               | X | X  | X               | X                              | X                      |                           |
| 12-lead ECG                                                     | X                    | X                                                                               |   |    |                 | X                              | X                      |                           |
| Adverse events <sup>8</sup>                                     | X                    | X                                                                               | X | X  | X               | X                              | X                      |                           |
| Concomitant medications                                         | X                    | X                                                                               | X | X  | X               | X                              | X                      | X                         |
| Haematology <sup>9</sup>                                        | X                    | X                                                                               | X | X  | X               | X                              | X                      |                           |
| Blood chemistry <sup>10</sup>                                   | X                    | X                                                                               | X | X  | X               | X                              | X                      |                           |
| Coagulation parameters <sup>11</sup>                            | X                    | X                                                                               | X | X  | X               | X                              | X                      |                           |
| Urine sample (pregnancy test for female patients) <sup>12</sup> | X                    | X                                                                               | X | X  | X               | X                              | X                      |                           |
| HBV/HCV test                                                    | X                    | As clinically indicated                                                         |   |    |                 |                                |                        |                           |
| Survival status                                                 |                      |                                                                                 |   |    |                 |                                |                        | X                         |

Abbreviations: KPS, Karnofsky Performance Score; CEA, carcinoembryonic antigen; EORTC-QLQ30: European Organization for Research and Treatment of Cancer Quality of Life Questionnaire form 30; ECG, electrocardiogram; EOT, end of treatment.

1. Patients on folinic acid/5-fluorouracil/oxaliplatin (FOLFOX) / FOLFIRI chemotherapy will be up to 16 cycles (approximately 6 months), at two-week intervals; while Oxaliplatin and Capecitabine (CAPEOX) chemotherapy will be up to 8 cycles (approximately 6 months), at three-week intervals.
2. Day 22 only for patients on CAPEOX chemotherapy .
3. Informed consent must be obtained prior to any study-specific of trial, and a signature 14 days prior to 1 st dose is acceptable.
4. Physical examination includes Height, weight, head, eyes, ears, nose, throat, neck, heart, chest (including the lung), abdomen, limbs, skin, lymph nodes, nervous system, and general condition.
5. A trial baseline scan (CT/MRI of chest, abdomen, and pelvis) must be completed within 28 days of the patient's first cycle of chemotherapy and every 2 months until progression. Tumor evaluation shall be performed per RECIST 1.1.
6. Patients will routinely have these blood tests done prior to each cycle.
7. Record nausea and vomiting from the start of chemotherapy to 24h after the end of chemotherapy, and from 24h to 120h after the end of chemotherapy.
8. Adverse events (AE) should be collected from the time of the first dose to 30 days after the end of treatment. AEs and laboratory abnormalities should be recovered until their recovery or can be otherwise explained. SAE shall be collected from the signing of ICF to 30 days after the last dose.
9. Hematology includes red blood cells, hemoglobin, platelet count, neutrophils, and white blood cell differential absolutes. For subjects whose dose is adjusted due to blood toxicity, a hematology test should be performed every week.
10. Blood chemistry parameters include total bilirubin, AST, ALT, total protein (TP), albumin (ALB), globulin (G), A/G, blood glucose, urea nitrogen, creatinine, alkaline phosphatase (ALP), lactate dehydrogenase (LDH), calcium, phosphorus, magnesium, potassium, sodium, pancreatic amylase, and uric acid.
11. Coagulation parameters include prothrombin time (PT), activated partial thromboplastin time (APTT), thrombin time (TT), fibrinogen (FIB), and international normalized ratio (INR).
12. Urinalysis sample parameters include pH, specific gravity, protein, urinary casts, white blood cell, red blood cells, urine glucose, and urine ketone. Pregnancy test: for women of childbearing potential, including women who have had a tubal ligation, must be performed and documented as negative within 7 days prior to randomization. Urine pregnancy test will be performed at each visit prior to dosing. A serum pregnancy test must be performed if the urine pregnancy test is positive or equivocal.

**Fig 1. SPIRIT schedule of tests and procedures.**

<https://doi.org/10.1371/journal.pone.0275058.g001>

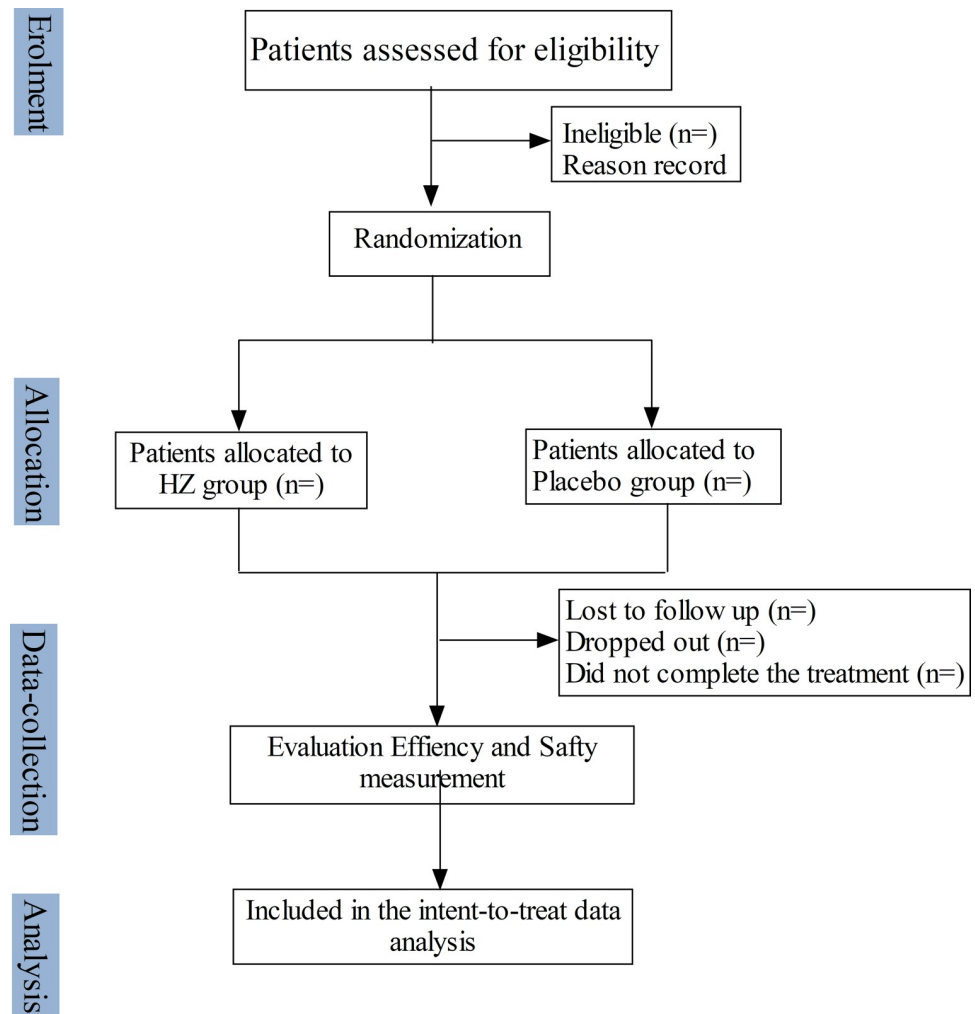

Fig 2. Flow chart.

<https://doi.org/10.1371/journal.pone.0275058.g002>

### Eligibility criteria

Participants meet the criteria during the screening examination to be eligible to participate in the study.

### Inclusion criteria

1. Patients who had histologically or cytologically confirmed adenocarcinoma of the colon or rectum that was metastatic or locally advanced with stage IV;
2. Patients who underwent imaging examination (PET-CT, CT, MRI, bone scan, X-ray) that confirmed the presence of measurable lesions defined by RECIST 1.1;
3. Patients with the age ranged of 18 to 75 years;
4. Patients with Karnofsky Performance Score (KPS) of  $\geq 50$  [33];
5. Patients who had no major surgery or open biopsy within 4 weeks of random assignment;

6. Patients who agree to receive first-line chemotherapy combined with targeted therapy (Patients may have received previous chemotherapy and/or chemoradiation per institutional standard of care. The last adjuvant therapy must have been concluded more than 6 months ago);
7. Patients with adequate organ and bone marrow functions as defined below: absolute neutrophil count (ANC) of  $>1.5 \times 10^9/L$ ; platelets count of  $>100 \times 10^9/L$ ; hemoglobin level of  $\geq 90$  g/L; total bilirubin level of  $\leq 1.5$  times the upper limit of normal (ULN); AST (SGOT) or ALT (SGPT) level of  $\leq 2.5$  times the ULN (or  $\leq 5$  times the ULN if it was attributable to liver metastases); Urine protein/creatinine ratio (UPCR) of  $<1.0$ .
8. Patients with the expected survival period of more than 12 weeks;
9. Patients are able to understand and willing to sign the written informed consent form.

### Exclusion criteria

1. Patients who had histologically confirmed mixed adenosquamous carcinoma with squamous cells as the main component;
2. Patients with other concurrent malignancies or had prior treatment for other carcinomas within the last 5 years, except cured carcinoma in situ of the cervix or non-melanoma skin cancer or superficial bladder tumors;
3. Patients who are pregnant or breastfeeding (a serum or urine pregnancy test is performed on all female patients who are of childbearing potential within 14 days prior to study entry);
4. Patients with prior history of hypertensive crisis, hypertensive encephalopathy, or uncontrolled hypertension (systolic blood pressure of  $>150$ mmHg, or diastolic blood pressure of  $>100$ mm Hg after anti-hypertensive therapy);
5. Patients who experienced vital organ failure or with other serious diseases including, but not limited to, coronary heart disease, cardiovascular diseases, or myocardial infarction within 12 months before being included in the study; severe neurological or psychiatric history; severe infection; active disseminated intravascular coagulation; serious diseases of the urinary system and digestive system;
6. Patients who had a combination of active hepatitis, pneumonia, and other serious infectious diseases;
7. Patients with a serious or non-healing wound, ulcer, or bone fracture;
8. Patients with CNS metastases and/or spinal cord compression, cancerous meningitis, or soft meningeal disease;
9. Patients with known to be allergic to compounds of 5-FU, capecitabine, oxaliplatin, leucovorin, or bevacizumab;
10. Patients have difficulty taking oral medication and vomit frequently.

### Randomization and blinding

Eligible patients will be randomly assigned to the placebo group or treatment group using the block randomization method, with a ratio of 1:1. The blocks are of variable sizes (2, 4, and 6) to protect concealment SAS version 9.4 statistical software (SAS Institute Inc., Cary, NC, USA)



will be used to generate random sequence and an interactive web-response system (IWRS) will be used to assign patients. Investigators will be enroll patients and use identifying information to register them in the interactive web-response system. Patients will be assigned three-digit random numbers and treatment groups. HZ granule and placebo granule have identical packaging, labeling, appearance, and administration schedules. Patients, investigators, study site staff, and the sponsor will be masked to treatment assignment until the database is locked.

### Sample size

The sample size for this trial is determined based on a prior study [34] in which the median value of PFS for metastatic colorectal patients receiving placebo plus mFOLFOX6/FOLFIRI/CAPEOX and CET or BV was 6.9 months, and an estimated median PFS of 9.6 months in the HZ granule plus mFOLFOX6/FOLFIRI/CAPEOX and CET or BV, the hazard ratio was estimated as 0.71.

A total of 288 events are required for this study based on a 1:1 randomization to have an 80% power to detect a difference assuming a true hazard ratio of 0.71 of HZ granule plus mFOLFOX6/FOLFIRI/CAPEOX and CET or BV using a two-sided log-rank test at a significance level of 0.05. The overall duration of the trial plan is 36 months, with the first 24 months being the enrollment phase, and follow-up continued for about 12 months. A total sample size of 360 patients with 180 in each group is required.

### Statistical analysis

All analyses will be performed by statisticians who are independent of the random allocation of groups, using SAS version 9.4. The efficacy analyses are based on the intention-to-treat population, which included all randomized patients. A two-sided P-value of less than 0.05 is considered statistical significance. A full analysis set (FAS) includes all randomized patients who received at least one treatment as close as possible to the principle of intentional analysis. Missing data are supplemented using the LOCF (last observation carried forward) method. Per-protocol analysis set (PPS) is restricted to participants who strictly followed the provided protocol, used the trial medicine in the range of 80%-120%, and completed the study. Safety analysis set (SS) defines as all subjects who accepted at least one dose of trial medication and underwent at least one post-treatment safety assessment. Continuous variables will be expressed as mean with SD or median with quartile range and analyses are performed using the student's test on normally distributed and homogeneity variables and Mann-Whitney's test on non-normal variables. Enumeration data are presented as percentages and analyses by chi-square test or Fisher exact test.

The primary endpoint of the study is PFS which will be estimated by the Kaplan-Meier method, including the median PFS and the proportion of subjects remaining progression-free at 9, 12, and 18 months. Hazard ratios and 95% confidence intervals will be presented for each group, using a log-rank test for univariate analysis and Cox proportional hazards regression for multivariable analysis.

Safety analysis will be provided the incidence of adverse events and adverse reactions that occurred in this clinical trial from baseline-normal to abnormal at the end of the study and abnormal baseline to the end of the study. The chi-squared test or Fisher test will be used to compare the incidence differences between the groups.

### Intervention

The participants will receive 6.0 g per grid of HZ granule or placebo 3 times a day based on combination chemotherapies, mFOLFOX6/FOLFIRI/CAPEOX and CET or BV until the

pause of disease progression, death, withdrawal, the exhibition of unacceptable toxicity, or up to 6 months. The formula HZ granule and placebo will be supplied by Sichuan Luye Pharmaceutical CO., Ltd. (Sichuan, China). The placebo consists of maltodextrin, a bitter compound, and a natural edible pigment, which are similar to HZ granule in appearance, taste, color, smell, and weight.

According to the NCCN guidelines, the protocol for chemotherapeutic regimen is recommended by physicians, considering the patient's need in selecting the mFOLFOX6/FOLFIRI/CAPEOX regimen, and appropriate dose adjustments will be made when patients become intolerant.

**mFOLFOX6 regimen.** mFOLFOX6 consists of 2-hour intravenous (IV) infusions of oxaliplatin at 85 mg/m<sup>2</sup> and leucovorin at 400 mg/m<sup>2</sup>, followed by a 400 mg/m<sup>2</sup> bolus infusion of 5-fluorouracil (5-FU), and then a 46- to 48-hour continuous infusion of 2400 mg/m<sup>2</sup> of 5-FU with repetition of every 2 weeks.

**FOLFIRI regimen.** FOLFIRI consists of 5-FU 400 mg/m<sup>2</sup> (IV bolus), leucovorin 400 mg/m<sup>2</sup> and irinotecan 180 mg/m<sup>2</sup>, followed by a continuous 46-hour infusion of 5-FU 2400 mg/m<sup>2</sup>. FOLFIRI treatment cycles will be repeated every 2 weeks.

**CAPEOX regimen.** Oxaliplatin will be given at a dose of 130 mg/m<sup>2</sup> through continuous IV infusion for 2 hours on the first day. Capecitabine will be taken orally twice daily in morning and evening at a dose of 1000mg/m<sup>2</sup>/d on days 1–14. CAPEOX chemotherapy will be administered every 3 weeks.

Based on RAS and BRAF gene detection, BV (5 mg/kg, intravenous infusion, day1, repeated in 2 weeks) or CET (500 mg/m<sup>2</sup>, intravenous infusion, day1, repeated in 2 weeks) will be administered in patients with wild type RAS gene and BRAF gene.

## Data management

In this study, we will record patients' data on paper case report forms (CRFs). The clinical investigator or clinical coordinator nominated by the investigator will input the data from the study medical record to CRFs promptly and accurately. The study supervisor will make site visits to review protocol compliance, compare CRFs against individual patients' medical records, and verify whether the drugs that are supplied, received, stored, distributed, and recovered, are recorded accordingly in accordance with relevant regulations. CRFs will be kept in a locked file cabinet that is pertinent to this research. An electronic data capture system will be used as a data management system provided by the Hospital of Chengdu University of Traditional Chinese Medicine. Data management will be performed by the investigator and monitored by an independent supervisor.

## Discussion

In recent years, chemotherapeutic drugs and biological agents have been used as the most effective therapies in the clinical treatment of mCRC with better outcomes of prolonged OS and PFS. However, oxaliplatin, capecitabine, BV, and CET cause a lot of adverse reactions and side effects, such as gastrointestinal reactions (nausea, vomiting, anorexia, and diarrhea) [10, 35–37], bone marrow suppression (neutropenia, peripheral sensory neuropathy, and neurotoxicity [38]) and hence, their efficacy needs to be further improved. It was reported that 20%-40% of mCRC patients receiving chemotherapy had to reduce their dose or even stop treatment due to intolerable drug-related toxicities [39, 40]. Furthermore, these negative side effects seriously affect patients' quality of life.

CHM plays an important role in the treatment of metastatic colorectal cancer and is commonly used in clinical practice in China. Previous studies showed that CHM reduced the



toxicity of chemotherapy, improved the effects of chemotherapy, promoted QOL, and relieved clinical symptoms [10]. However, there are only a few studies that concentrated on CHM combined with chemotherapy and other targeted treatment on survival outcomes in mCRC. In addition, small patient samples, non-randomized studies, and low-quality research are limitations to the development of evidence-based guidelines for using CHM in clinical practice. Hence, this prospective, multi-center, randomized, double-blinded, placebo-controlled clinical trial will investigate the benefit of HZ Granule in patients with mCRC.

HZ Granule as a classic formula of Chinese medicine is an available option for prolonging PFS, improving the quality of life of patients, and reducing or preventing chemotherapy-related AEs in patients with mCRC.

We believe that the findings of this study can be used to provide information on effective options in clinical practice.

### **Ethics and dissemination**

This study was approved by the Ethics Committee of the Hospital of Chengdu University of Chinese Medicine Hospital (2020KL-030). The trial was registered in the Chinese Clinical Trial Registry (ChiCTR). The final results of this study will be disseminated to the public in open-access journals and academic conferences.

The trial registration number was ChiCTR2100041643.

### **Trial status**

Recruitment began in July 2021, therefore 39 patients have been recruited. It is expected to finish recruiting in June 2024, 36 months in total.

### **Conclusion**

This study is the first step of a large-scale randomized controlled clinical trial using Chinese herbal medicine for mCRC in the province of Sichuan, China since evidence-based treatment using CHM in patients with mCRC is still lacking. The results may also provide information on effective options for the treatment of mCRC in clinical practice.

### **Supporting information**

**S1 Checklist. SPIRIT checklist.**  
(DOC)

**S1 Protocol. Study protocol.**  
(DOCX)

### **Acknowledgments**

We would like to thank Dr. Xi Fu for his experts on the review of the trial protocol and study documents. We also acknowledge gratefully the China Academy of Chinese Medical Sciences, China Center for Evidence Based Traditional Chinese Medicine for supporting this study.

### **Author Contributions**

**Conceptualization:** Qiaoling Wang.

**Investigation:** Zhuohong Li.

**Methodology:** Jing Guo, Wenyuan Li, Fengming You.

**Project administration:** Fengming You.

**Validation:** Wenyuan Li, Fengming You.

**Writing – original draft:** Qiaoling Wang.

**Writing – review & editing:** Zhuohong Li.

## References

1. GBD 2017 Colorectal Cancer Collaborators. The global, regional, and national burden of colorectal cancer and its attributable risk factors in 195 countries and territories, 1990–2017: a systematic analysis for the Global Burden of Disease Study 2017. *Lancet Gastroenterol Hepatol*. 2019 Dec; 4(12):913–933. [https://doi.org/10.1016/S2468-1253\(19\)30345-0](https://doi.org/10.1016/S2468-1253(19)30345-0) PMID: 31648977
2. Dekker E, Tanis PJ, Vleugels JL A, Kasi PM, Wallace MB. Colorectal cancer. *Lancet* 2019; 394:1467–1480. [https://doi.org/10.1016/S0140-6736\(19\)32319-0](https://doi.org/10.1016/S0140-6736(19)32319-0) PMID: 31631858
3. Feng RM, Zong YN, Cao SM, Xu RH. Current cancer situation in China: good or bad news from the 2018 Global Cancer Statistics? *Cancer Commun*. 2019 Apr; 39(1):22.
4. Xia CF, Dong XS, Li H, Cao MM, Sun DQ, He SY, et al. Cancer statistics in China and United States, 2022: profiles, trends, and determinants. *Chinese Medical Journal*. 2022 Feb; 135(5) 584–890. <https://doi.org/10.1097/CM9.0000000000002108> PMID: 35143424
5. Mody K, Baldeo C, Bekaii-Saab T. Antiangiogenic Therapy in Colorectal Cancer. *Cancer journal*. 2018 Jul/Aug; 24(4): 165–170. <https://doi.org/10.1097/PPO.0000000000000328> PMID: 30119079
6. Benoist C, Christophe T, Franck B. Therapeutic strategy in unresectable metastatic colorectal cancer: An updated review. *Ther Adv Med Oncol*. 2015 May; 7(3):153–169. <https://doi.org/10.1177/1758834015572343> PMID: 26673925
7. Modesta DP, Pant S, Sartore-Bianchi A. Treatment sequencing in metastatic colorectal cancer. *European Journal of Cancer*. 2019 Mar; 109:70–83. <https://doi.org/10.1016/j.ejca.2018.12.019> PMID: 30690295
8. Geng F, Wang Z, Yin H, Yu J, Cao B. Molecular Targeted Drugs and Treatment of Colorectal Cancer: Recent Progress and Future Perspectives. *Cancer Biother Radiopharm*. 2017 Jun; 32(5):149–160. <https://doi.org/10.1089/cbr.2017.2210> PMID: 28622036
9. Goldberg R, Sargent D, Morton R, Fuchs C, Ramanathan R, Williamson S, et al. Randomized controlled trial of reduced-dose bolus fluorouracil plus leucovorin and irinotecan or infused fluorouracil plus leucovorin and oxaliplatin in patients with previously untreated metastatic colorectal cancer: a North American Intergroup Trial. *J Clin Oncol*. 2006 Jul; 24(21):3347–3353. <https://doi.org/10.1200/JCO.2006.06.1317> PMID: 16849748
10. Lam W, Bussom S, Guan F, Jiang Z, Zhang W, Gullen EA, et al. The four-herb Chinese medicine PHY906 reduces chemotherapy-induced gastrointestinal toxicity. *Sci Transl Med*. 2010 Aug; 2(45):45–59. <https://doi.org/10.1126/scitranslmed.3001270> PMID: 20720216
11. Zhang XY, Qiu H, Li CS, Cai PP, Qi FH. The positive role of traditional Chinese medicine as an adjunctive therapy for cancer. *Biosci Trends*. 2021, 15(5):283–298. <https://doi.org/10.5582/bst.2021.01318> PMID: 34421064
12. Liang YC, Tsai SH, Chen L, Lin-Shiau SY, Lin JK. Resveratrol-induced g2 arrest through the inhibition of cdk7 and p34cdc2 kinases in colon carcinoma ht29 cells. *Bio-chem Pharmacol*. 2003 Apr; 65(7): 1053–1060. [https://doi.org/10.1016/s0006-2952\(03\)00011-x](https://doi.org/10.1016/s0006-2952(03)00011-x) PMID: 12663041
13. Juan ME, Wenzel U, Daniel H, Planas JM. Resveratrol induces apoptosis through ros-dependent mitochondria pathway in ht-29 human colorectal carcinoma cells. *J Agric Food Chem*. 2008 Jun; 56(12): 4813–4818. <https://doi.org/10.1021/jf800175a> PMID: 18522405
14. Mok T S K, Yeo W, Johnson P J, Hui P, Ho W M, Lam K C, et al. A double-blind placebo-controlled randomized study of Chinese herbal medicine as complementary therapy for reduction of chemotherapy-induced toxicity. *Annals of Oncology*. 2007 Apr; 18(4):768–774. <https://doi.org/10.1093/annonc/mdl465> PMID: 17229769
15. Fan YL, Yang C, Wu XK, Zhang J, He SM, Zhang XY. Curative Effect of Jianpi Yiqi Jiedu Decoction Combined with Chemotherapy on the Patients with Advanced Colorectal Cancer. *Progress in Modern Biomedicine*. 2017 Nov; 12(32):6315–19. <https://doi.org/10.13241/j.cnki.pmb.2017.32.025>
16. Zhang T, Yang Y F, He B, Yi DH, Hao J, Zhang D. Efficacy and Safety of Quxie Capsule in Metastatic Colorectal Cancer: A Double-Blind Randomized Placebo Controlled Trial. *Chin J Integr Med* <https://pubmed.ncbi.nlm.nih.gov/?term=https://www.ncbi.nlm.nih.gov/nlmcatalog?term=>. 2018 Mar; 24(3):171–7. <https://doi.org/10.1007/s11655-017-2962-2> PMID: 28840585

17. Li LX, Wang YJ, Huang XW, Sun J, Zhang J. Effect of Xiaoyutang Combined with Intraperitoneal Heat Perfusion Chemotherapy on Immune Function, Circulating mir, Prognosis, and Survival of Postoperative Patients with Colorectal Cancer. *Comput Math Methods Med*. 2021 Dec; 2021:1619809. <https://doi.org/10.1155/2021/1619809> PMID: 34950221
18. Jia R, Liu NN, Cai GX, Zhang Y, Xiao HJ, Zhou LH, et al. Effect of PRM1201 Combined With Adjuvant Chemotherapy on Preventing Recurrence and Metastasis of Stage III Colon Cancer: A Randomized, Double-Blind, Placebo-Controlled Clinical Trial. *Front Oncol*. 2021 Mar; 11:618793. <https://doi.org/10.3389/fonc.2021.618793> PMID: 33747930
19. Curra M, Soares Junior LAV, Martins MD, Santos PSDS. Chemotherapy protocols and incidence of oral mucositis. An integrative review. *Einstein (Sao Paulo)*. 2018 Apr; 16(1):eRW4007. <https://doi.org/10.1590/s1679-45082018rw4007> PMID: 29694618
20. Li YJ, Qiu SG, Liang J. Clinical Study on Banxia Xiexin Decoction in Treatment of Disharmony between Liver and Spleen after Colorectal Cancer Surgery. *World Chinese Medicine*. 2017 Jul; 12(7):1523–1530.
21. Zhao LM, Liu MS, Shu ZF. Clinical Study on Modified Banxia Xiexin Tang Combined with FOLFOX Scheme for Colorectal Cancer. *Journal of New Chinese medicine*. 2021 Jul; 53(14):117–120.
22. Liang D. Clinic research of Hezhong decoction on the prevention of nausea-vomiting-anorexia caused by highly emetogenicity chemotherapy[D]. Chengdu: Chengdu University of Traditional Chinese Medicine. 2021. <https://doi.org/10.26988/d.cnki.gcdzu.2021.000711>
23. Du L. Clinical study of Hezhong decoction in the prevention and treatment of Digestive tract symptoms of nausea-vomiting-anorexia induced by chemotherapy middle and advanced colorectal cancer[D]. Chengdu: Chengdu University of Traditional Chinese Medicine. 2021. <https://doi.org/10.26988/d.cnki.gcdzu.2021.000711>
24. Zhao JY, Li JX, Zhang YM, Dong ZF, Wang JN. Efficacy and mechanism of Xiaobanxia Decoction and categorized formula in preventing and treating delayed chemotherapeutic vomiting. *International Journal of Traditional Chinese Medicine*. 2020 Feb; 42(02):138–143. <https://doi.org/10.3760/cma.j.issn.1673-4246.2020.02.009>
25. Zhang T, Nie K. Study on the Preventing and Treating Chemotherapy-Induced Nausea and Vomiting Anti-inflammatory and Anti-inflammatory Effects of Antiemetic Chinese Herbal Medicines. *Shandong Journal of Traditional Chinese Medicine*. 2018 Jul; 37(07):611–614. <https://doi.org/10.16295/j.cnki.0257-358x.2018.07.023>
26. Yu CG. Study on the Multi-target Mechanisms of Xiao-Ban-Xia-Tang in the Prevention and Treatment of Chemotherapy-induced nausea and Vomiting [D]. Shandong: Shandong University of Traditional Chinese Medicine. 2015.
27. Zhang T, Wang MW, Chen SW. Anti-emetic Effect of Ethanol Extract from “Wuzhuyu Broth”. *China Journal of Chinese Materia Medica*. 2002 Nov; 11:61–65.
28. Niezgoda HE, Pater JL. A validation study of the domains of the core EORTC quality of life questionnaire. *Qual Life Res*. 1993 Oct; 2(5):319–25. <https://doi.org/10.1007/BF00449426> PMID: 8136796
29. Ng TL, Hutton B, Clemons M. Chemotherapy-induced nausea and vomiting: time for more emphasis on nausea? *Oncologist*. 2015; 20:576–583. [PubMed: <https://doi.org/10.1634/theoncologist.2014-0438> PMID: 25948677].
30. Eisenhauer EA, Therasse P, Bogaerts J, Schwartz LH, Sargent D, Ford R, et al. New response evaluation criteria in solid tumours: revised RECIST guideline (version 1.1). *Eur J Cancer*. 2009 Jan; 45(2) 228–247. <https://doi.org/10.1016/j.ejca.2008.10.026> PMID: 19097774
31. Wong CK, Guo VY, Chen J, Lam CL. Methodological and reporting quality of comparative studies evaluating health-related quality of life of colorectal cancer patients and controls: a systematic review. *Dis Colon Rectum*. 2016 Nov; 59(11): 1073–1086. <https://doi.org/10.1097/DCR.0000000000000618> PMID: 27749483
32. National Cancer Institute. Common Terminology Criteria for Adverse Events. Version 4.0. NCI 2010. Accessed on 28 June 2019.
33. Hwang SS, Scott CB, Chang VT, Cogswell J, Srinivas S, Kasimis B. Prediction of survival for advanced cancer patients by recursive partitioning analysis: role of Karnofsky performance status, quality of life, and symptom distress. *Cancer Invest*. 2004; 22(5):678–687. <https://doi.org/10.1081/cnv-200032911> PMID: 15581048
34. Liu NN, Wu CJ, Jia R, Cai GX, Wang Y, Zhou LH, et al. Traditional Chinese Medicine Combined With Chemotherapy and Cetuximab or Bevacizumab for Metastatic Colorectal Cancer: A Randomized, Double-Blind, Placebo-Controlled Clinical Trial. *Front. Pharmacol*. 2020 Apr; 11:478. <https://doi.org/10.3389/fphar.2020.00478> PMID: 32372960
35. Hurwitz H, Fehrenbacher L, Novotny W, Cartwright T, Hainsworth J, Heim W, et al. Bevacizumab plus Irinotecan, Fluorouracil, and Leucovorin for Metastatic Colorectal Cancer. *N Engl J Med*. 2004 Jun; 350(23):2335–2342. <https://doi.org/10.1056/NEJMoa032691> PMID: 15175435

36. Kuebler JP, Wieand HS, O'Connell MJ, Smith RE, Colangelo LH, Yothers G, et al. Oxaliplatin combined with weekly bolus fluorouracil and leucovorin as surgical adjuvant chemotherapy for stage II and III colon cancer: results from NSABP C-07. *J Clin Oncol*. 2007 Jun; 25(16):2198–2204. <https://doi.org/10.1200/JCO.2006.08.2974> PMID: 17470851
37. Kidwell KM, Yothers G, Ganz PA, Land SR, Ko CY, Cecchini RS, et al. Long-term neurotoxicity effects of oxaliplatin added to fluorouracil and leucovorin as adjuvant therapy for colon cancer: results from National Surgical Adjuvant Breast and Bowel Project trials C-07 and LTS-01. *Cancer*. 2012 Nov; 118:5614–5622. <https://doi.org/10.1002/ncr.27593> PMID: 22569841
38. André T, Boni C, Navarro M, Tabernero J, Hickish T, Topham C, et al. Improved overall survival with oxaliplatin, fluorouracil, and leucovorin as adjuvant treatment in stage II or III colon cancer in the MOSAIC trial. *J Clin Oncol*. 2009 Jun; 27(19):3109–3116. <https://doi.org/10.1200/JCO.2008.20.6771> PMID: 19451431
39. Gao J, He Q, Li Y, Shen L, Hua D, Mao J. Clinical and T. Oncology: Polymorphism of TS 3'-UTR predicts survival of Chinese advanced gastric cancer patients receiving first-line capecitabine plus paclitaxel. *Clin Transl Oncol*. 2013 Aug; 15(8):619–625.
40. Kotaka M, Yamanaka T, Yoshino T, Manaka D, Eto T, Hasegawa J, et al. Safety data from the phase III Japanese ACHIEVE trial: part of an international, prospective, planned pooled analysis of six phase III trials comparing 3 versus 6 months of oxaliplatin-based adjuvant chemotherapy for stage III colon cancer. *ESMO open*. 2018 Apr; 3(3):e000354. <https://doi.org/10.1136/esmoopen-2018-000354> PMID: 29713499
